# Supplementary material for: Transcriptional Regulation of the Equol Biosynthesis Gene Cluster in Adlercreutzia equolifaciens DSM19450T
Source: MDPI journal article supplement (doi:10.3390/nu11050993), 2019-04-30
Supplement: s1 [file s1]

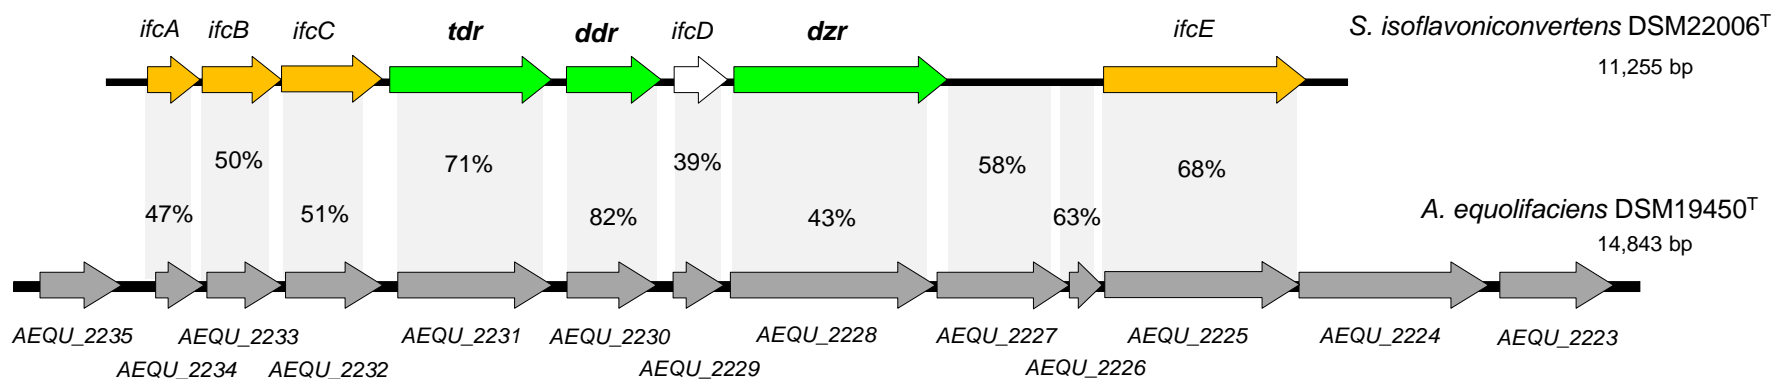

**Supplementary Figure 1.-** Comparison of equol biosynthesis clusters from *Slackia isoflavoniconvertens* DSM22006<sup>T</sup> and *A. equolifaciens* DSM19450<sup>T</sup>. In *S. isoflavoniconvertens*, green-coloured genes have been demonstrated to be essential for equol production; proteins from orange-coloured genes have been found to be induced by daidzein (Schöder et al., 2013).
